# Supplementary material for: Implementation of micelle-enabled C(sp2)–C(sp3) cross-electrophile coupling in pharmaceutical synthesis
Source: Royal Society of Chemistry journal article supplement (doi:10.1039/d3cc05916b), 2024-01-01

# Implementation of micelle enabled C(sp<sup>2</sup>)-C(sp<sup>3</sup>) cross-electrophile coupling in pharmaceutical synthesis

Bin Wu<sup>\*a</sup>, Ning Ye<sup>\*a</sup>, Kangming Zhao,<sup>a</sup> Min Shi,<sup>a</sup> Jiayu Liao,<sup>a</sup> Jing Zhang,<sup>a</sup> Wei Chen,<sup>a</sup> Xianzhong Li,<sup>a</sup> Yunfeng Han,<sup>a</sup> Margery Cortes-Clerget,<sup>b</sup> Morgan Louis Regnier,<sup>b</sup> Michael Parmentier,<sup>b</sup> Mathes Christan,<sup>b</sup> Florian Rampf,<sup>b</sup> Fabrice Gallou<sup>\*b</sup>

<sup>a</sup>Chemical & Analytical Development, Suzhou Novartis Technical Development Co., Ltd, Changshu, Jiangsu 215537, China. Email: [bin-3.wu@novartis.com](mailto:bin-3.wu@novartis.com); [ning.ye@novartis.com](mailto:ning.ye@novartis.com);

<sup>b</sup>Chemical & Analytical Development, Novartis Pharma AG, 4056 Basel, Switzerland  
Email: [fabrice.gallou@novartis.com](mailto:fabrice.gallou@novartis.com)

## Contents

|                                                                              |          |
|------------------------------------------------------------------------------|----------|
| <b>Materials and Methods</b> .....                                           | <b>2</b> |
| <b>General procedure</b> .....                                               | <b>2</b> |
| <b>Table S1 Full data of ICP measurement</b> .....                           | <b>3</b> |
| <b>Full author names of reference Cell. Chem. Biol., 2023, 30, 235</b> ..... | <b>4</b> |
| <b><sup>1</sup>H and <sup>13</sup>C NMR Spectra</b> .....                    | <b>5</b> |

## Materials and Methods

**General.** All chemicals, reagents, and solvents were purchased from commercial sources and were used without further purification unless otherwise noted.  $^1\text{H}$  NMR data are reported relative to residual solvent signals and are reported as follows: chemical shift ( $\delta$  ppm), multiplicity, coupling constant (Hz), and integration. The multiplicities are denoted as follows: s, singlet; d, doublet; t, triplet; q, quartet; m, multiplet; br, broad.  $^1\text{H}$  NMR and  $^{13}\text{C}$  NMR spectra were recorded on a Bruker spectrometer at frequencies of 400 and 100 MHz respectively, using  $\text{DMSO-}d^6$ . Unless otherwise notice, the  $^1\text{H}$  NMR experiments are performed at room temperature (298 K) and 16 times of scans by default; the  $^{13}\text{C}$  NMR experiments are performed at room temperature (298 K) and 1024 times of scans by default. HRMS were obtained on Waters ACQUITY UPLC/Xevo G2 QTOF SYSTEM. UPLC analysis was performed on Agilent 1290 Infinity LC System.

**Materials.** Unless otherwise noted, commercial reagents were purchased from Aldrich, J&K Scientific Ltd., and other commercial suppliers and were used as received.

### General procedure

**Preparation of the catalyst/ligand solution:** In reactor A was added  $\text{Ni}(\text{OAc})_2 \cdot 4\text{H}_2\text{O}$  (35 g, 5 mol%), 3,4,7,8-tetramethyl-1,10-phenanthroline (40 g, 6 mol%) and exchanged with  $\text{N}_2$  atmosphere for three times. 2 wt% aqueous TPGS-750-M (4 kg) was added. The resulting mixture was stirred at 45 °C for 30 min to obtain a clear pink solution to be directly used in the following step.

**General procedure for the reaction:** In reactor B was added Me-THF (5.5 kg), 2 wt% aqueous TPGS-750-M (2 kg) and bubbling with  $\text{N}_2$  for 60 mins. 1-benzyl-4-iodopiperidine-HCl salt **2a** (1.4 kg, 1.5 equiv.) was added followed by DIPEA (1.1 kg, 3 equiv.), and the resulting mixture was stirred at 45 °C for 3 h. Then 5-bromophthalide **1a** (0.6 kg, 1 equiv.),  $\text{Cu}_2\text{O}$  (6 g, 0.15 mol%) were added and the mixture was stirred at this temperature for 10 mins. The pre-mixed catalyst solution in reactor A was transferred to reactor B and zinc (0.46 kg, 2.5 equiv.) was added (Note: Thermal release was observed and adding zinc in portions is highly recommended). The resulting mixture was stirred at 45 °C for 16 h and the progress was monitored by HPLC analysis. Upon reaction completion, the zinc dust was removed by filtration via MCC (0.6 kg) and washed with additional Me-THF (2.6 kg). A two-layer solution was collected and layer separation to collect upper organic layer. The organic layer was concentrated (~6 kg distilled out) and to this reactor was added i-PrOH (2.8 kg). Continue to distill out 1.7 kg of organic solvent and raise the internal temperature to 70 °C to obtain a light brown clean solution. Water (10.5 kg) was added slowly during 2 h and stirred at this temperature for 1 h. The temperature was cooled to 20 °C over 3 h and stirred at this temperature for 10 h to obtain a suspension. Filtration to get the wet cake and drying under vacuum to obtain the desired product as a light brown solid.



## Discovery and characterization of a selective IKZF2 glue degrader for cancer immunotherapy

Simone Bonazzi,<sup>1,4,\*</sup> Eva d'Hennezel,<sup>1,4,\*</sup> Rohan E.J. Beckwith,<sup>1,4</sup> Lei Xu,<sup>1</sup> Aleem Fazal,<sup>1</sup> Anna Magracheva,<sup>1</sup> Radha Ramesh,<sup>1</sup> Artiom Cernijenko,<sup>1</sup> Brandon Antonakos,<sup>1</sup> Hyo-eun C. Bhang,<sup>1</sup> Roxana García Caro,<sup>1</sup> Jennifer S. Cobb,<sup>1</sup> Elizabeth Ornelas,<sup>2</sup> Xiaolei Ma,<sup>2</sup> Charles A. Wartchow,<sup>2</sup> Matthew C. Clifton,<sup>2</sup> Ry R. Forseth,<sup>3</sup> Bethany Hughes Fortnam,<sup>1</sup> Hongbo Lu,<sup>1</sup> Alfredo Csibi,<sup>1</sup> Jennifer Tullai,<sup>1</sup> Seth Carbonneau,<sup>1</sup> Noel M. Thomsen,<sup>1</sup> Jay Larrow,<sup>1</sup> Barbara Chie-Leon,<sup>2</sup> Dominik Hainzl,<sup>1</sup> Yi Gu,<sup>1</sup> Darlene Lu,<sup>1</sup> Matthew J. Meyer,<sup>1</sup> Dylan Alexander,<sup>1</sup> Jacqueline Kinyamu-Akunda,<sup>3</sup> Catherine A. Sabatos-Peyton,<sup>1</sup> Natalie A. Dales,<sup>1</sup> Frédéric J. Zécri,<sup>1</sup> Rishi K. Jain,<sup>1</sup> Janine Shulok,<sup>1</sup> Y. Karen Wang,<sup>1</sup> Karin Briner,<sup>1</sup> Jeffery A. Porter,<sup>1</sup> John A. Tallarico,<sup>1</sup> Jeffrey A. Engelman,<sup>1</sup> Glenn Dranoff,<sup>1</sup> James E. Bradner,<sup>1</sup> Michael Visser,<sup>1,4</sup> and Jonathan M. Solomon<sup>1,4,5,\*</sup>

<sup>1</sup>Novartis Institutes for Biomedical Research, Cambridge, MA, USA

<sup>2</sup>Novartis Institutes for Biomedical Research, Emeryville, CA, USA

<sup>3</sup>Novartis Institutes for Biomedical Research, East Hanover, NJ, USA

<sup>4</sup>These authors contributed equally

<sup>5</sup>Lead contact

\*Correspondence: [simone.bonazzi@novartis.com](mailto:simone.bonazzi@novartis.com) (S.B.), [eva.dhennezel@novartis.com](mailto:eva.dhennezel@novartis.com) (E.d'H.), [jonathan.solomon@novartis.com](mailto:jonathan.solomon@novartis.com) (J.M.S.)  
<https://doi.org/10.1016/j.chembiol.2023.02.005>

1H NMR

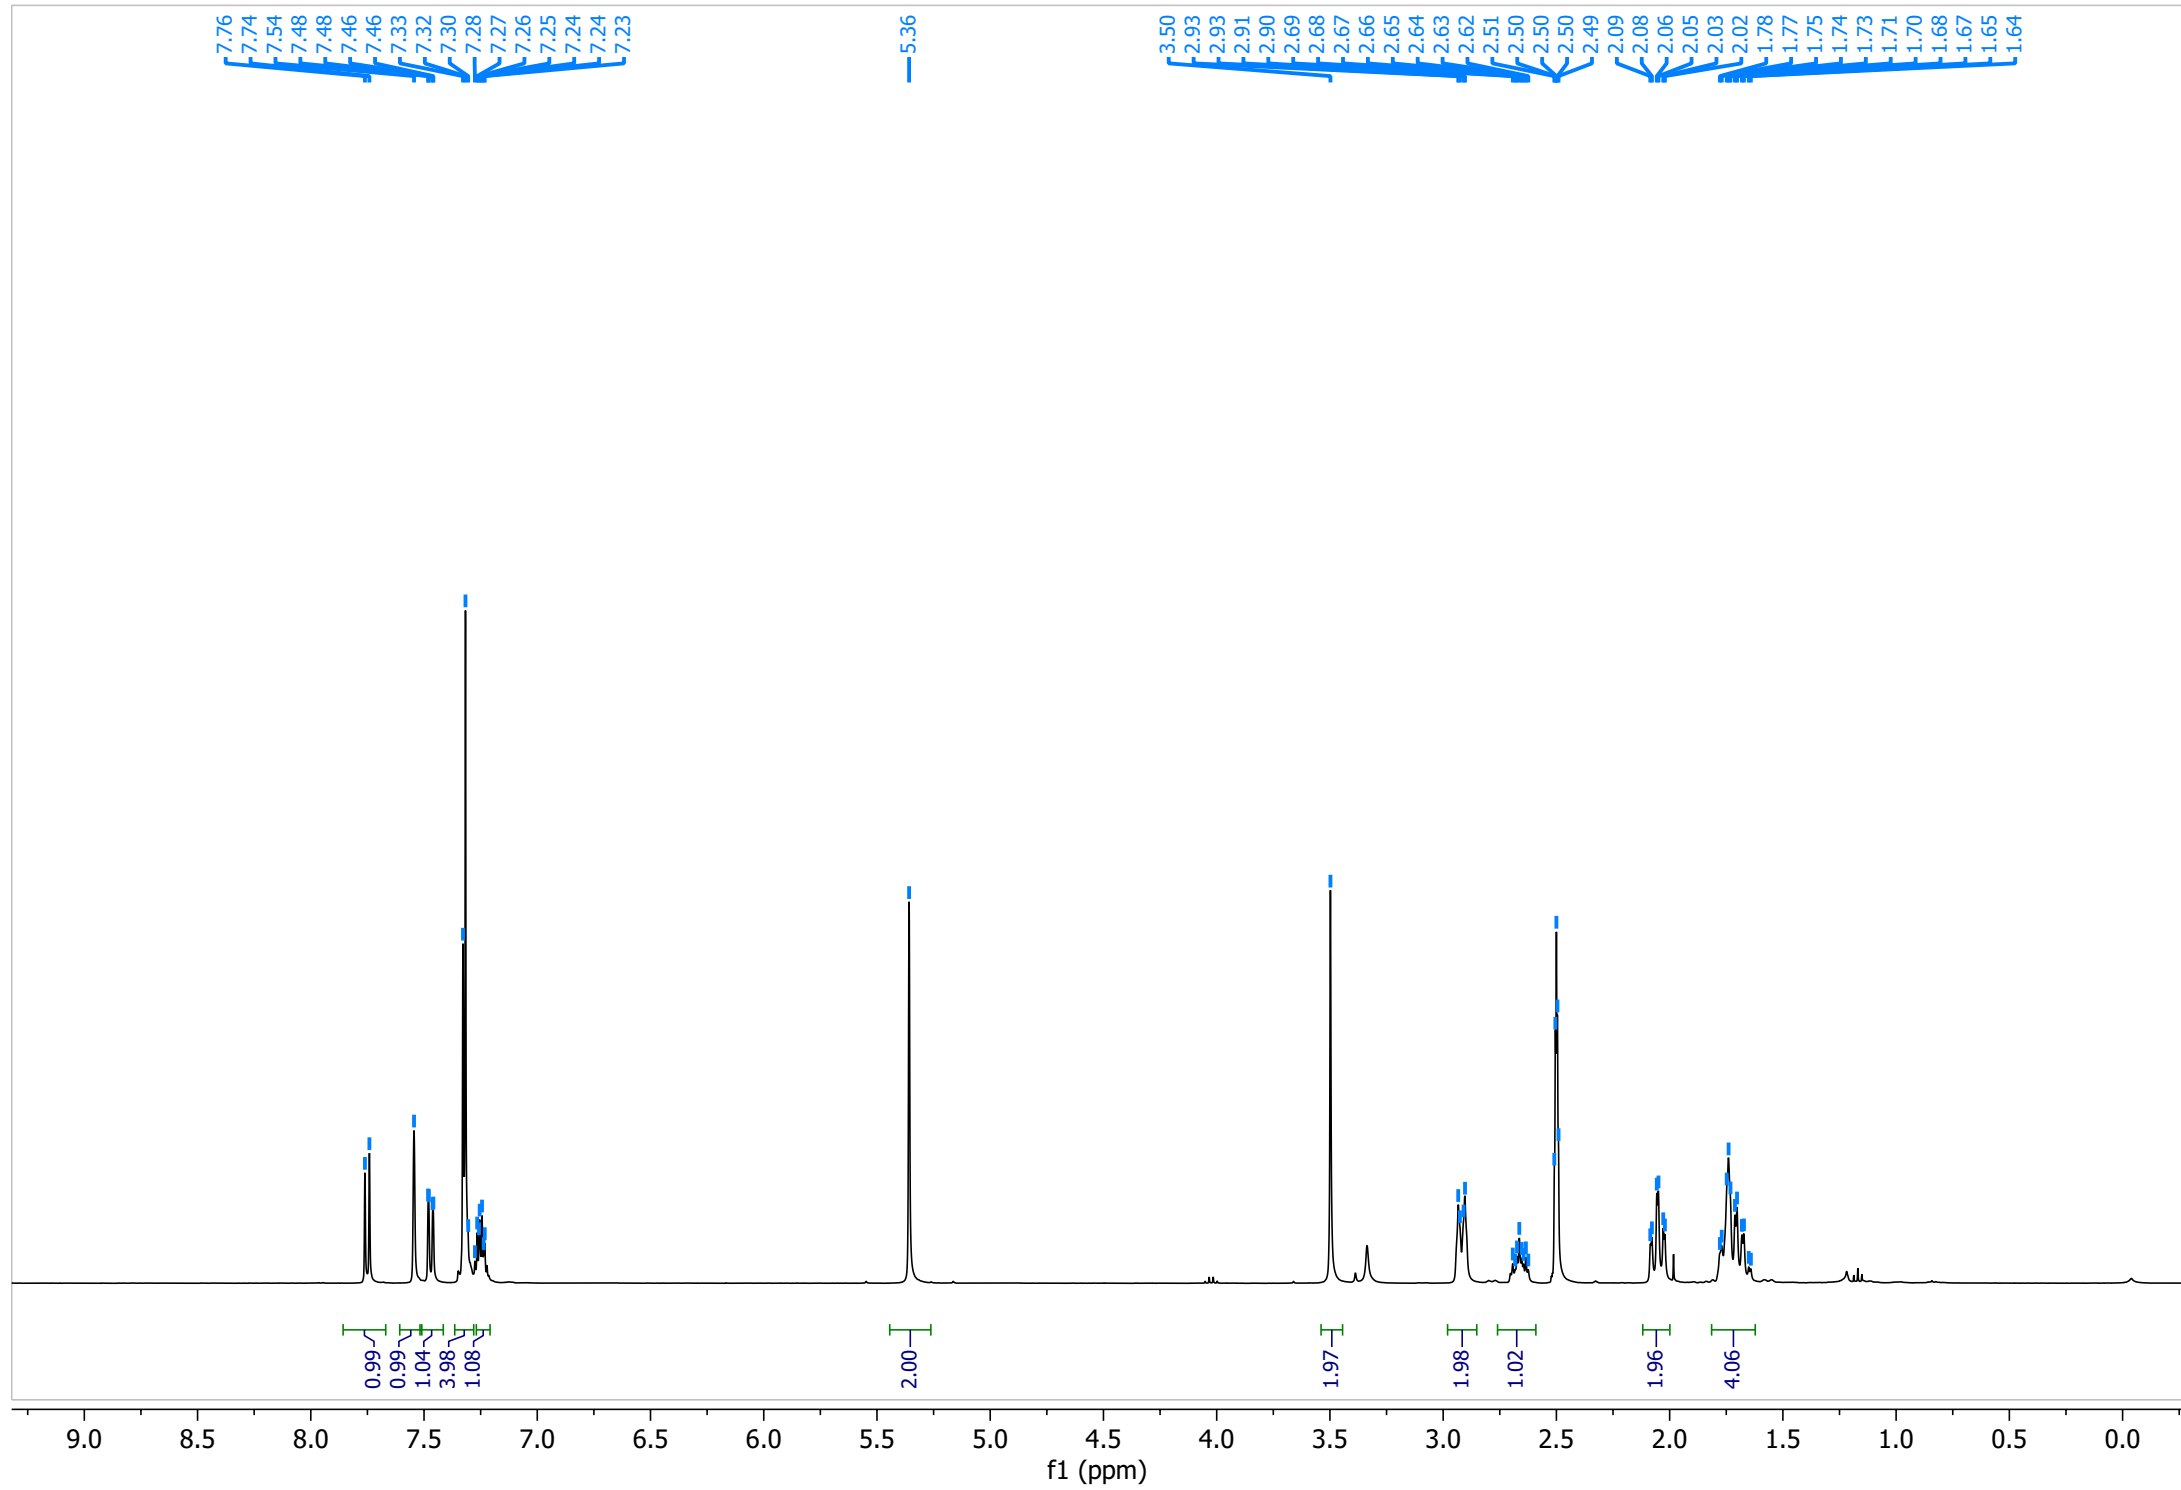

<sup>13</sup>C NMR

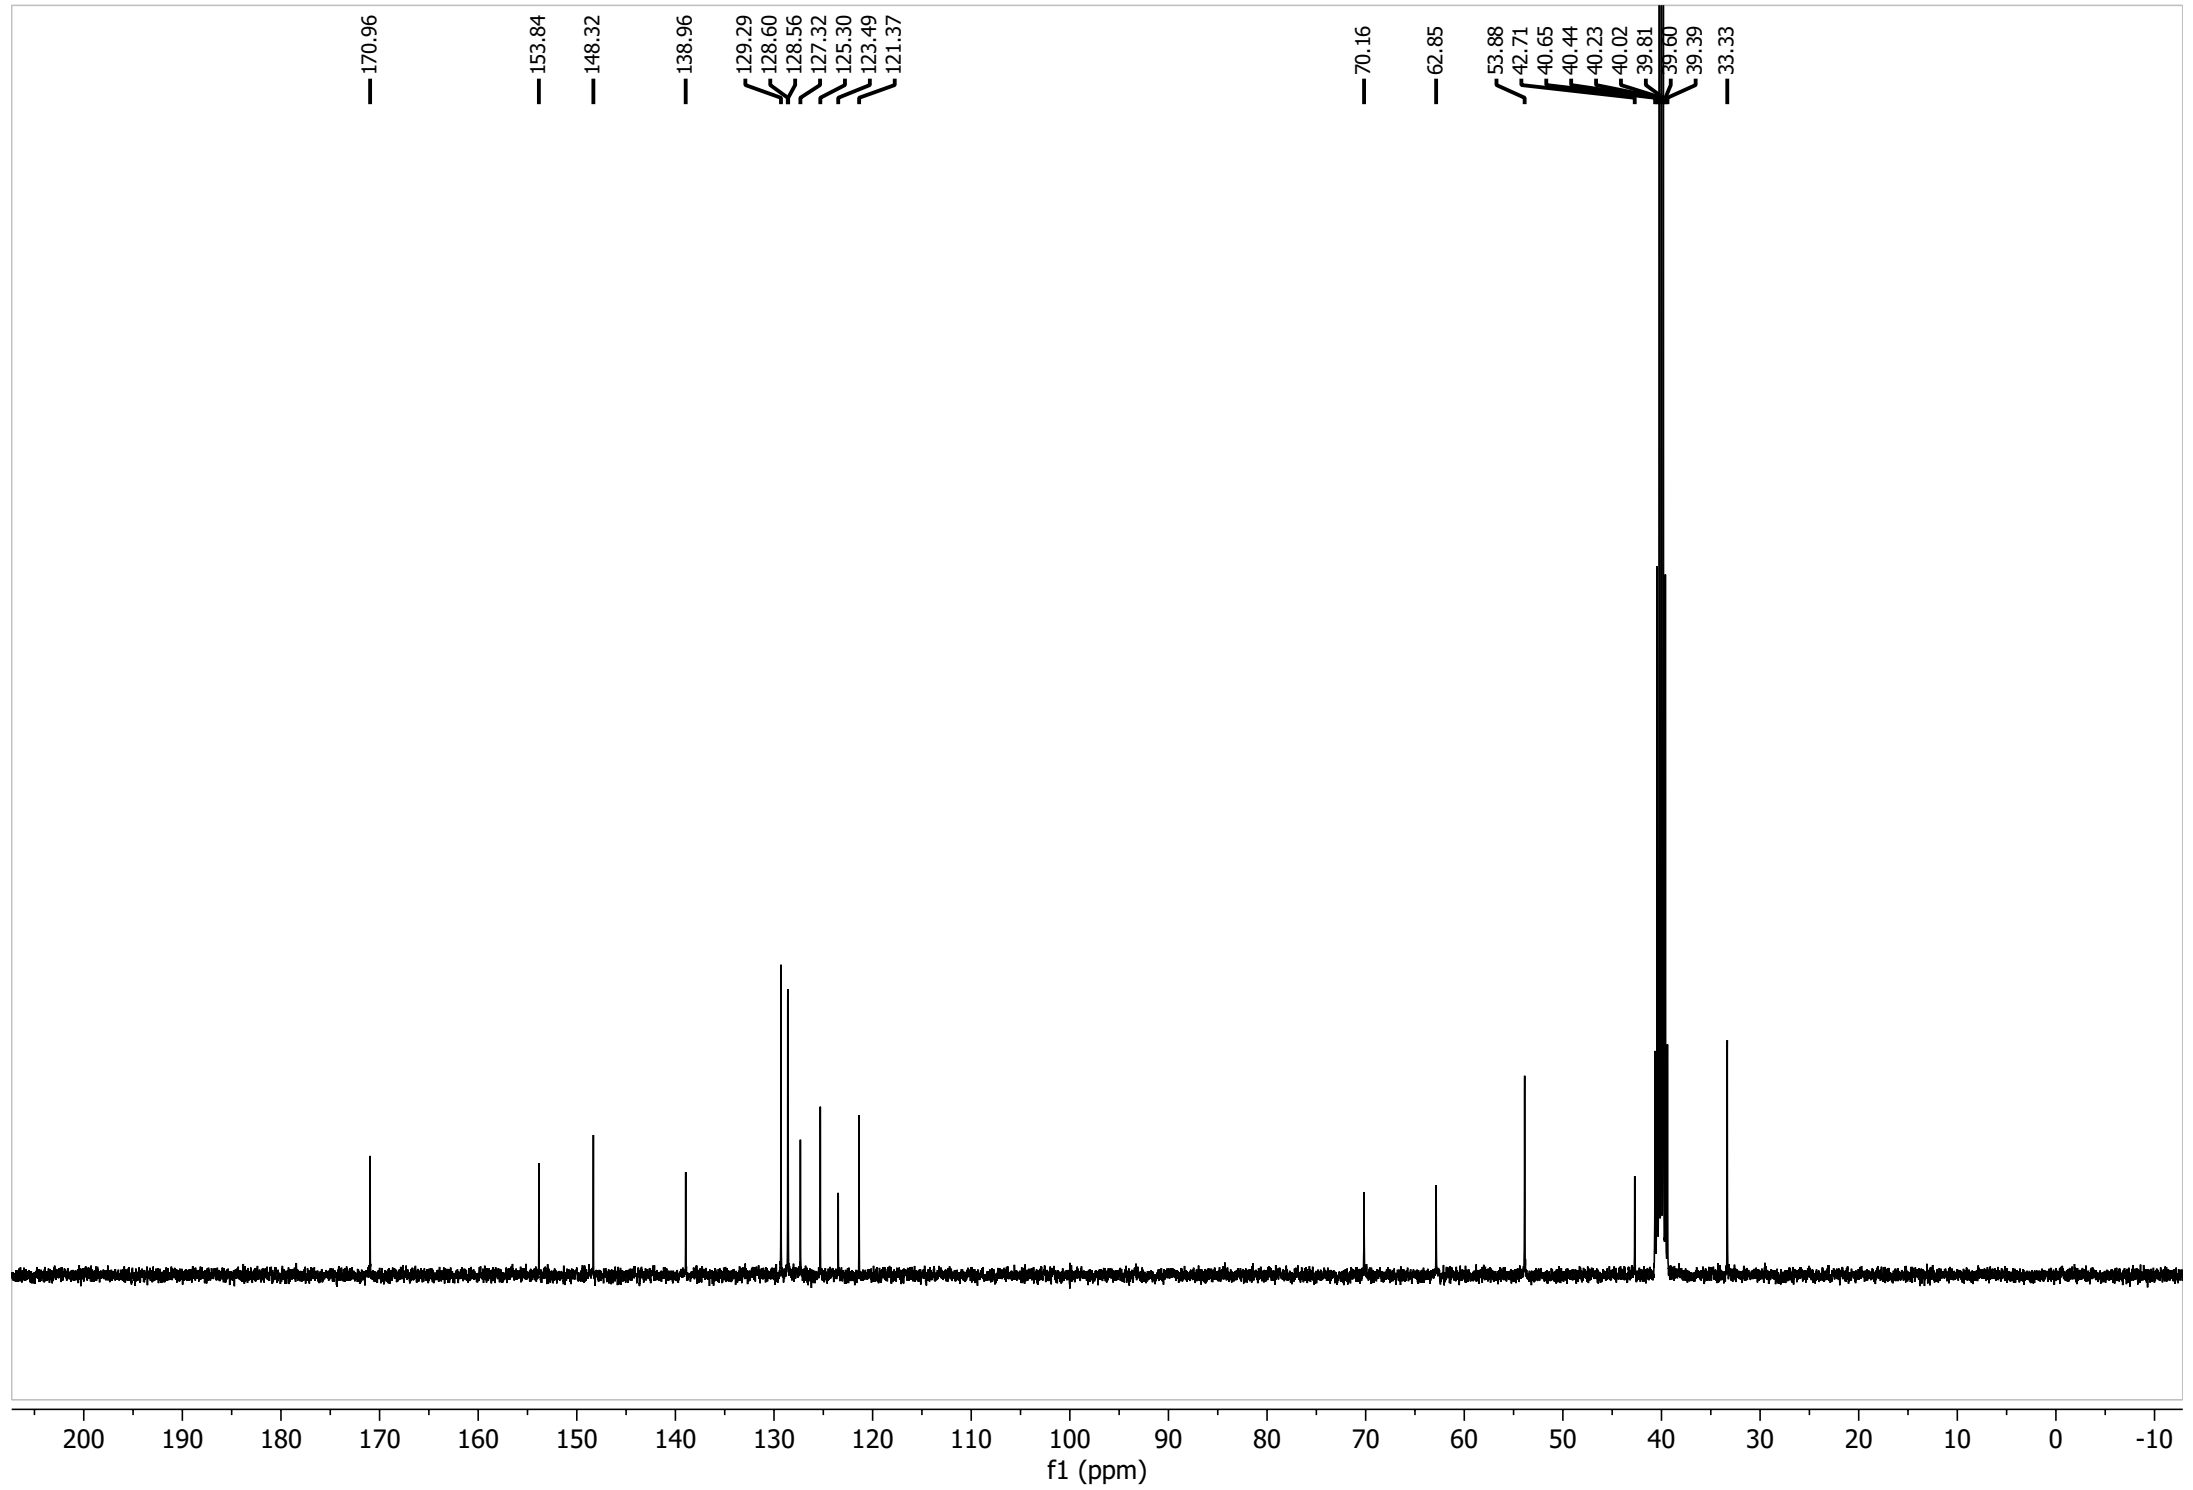

Supplement: d3cc05916b1.pdf [file d3cc05916b1.pdf]
